# Supplementary material for: Probing molecular basis of single-walled carbon nanotube degradation and nondegradation by enzymes based on manganese peroxidase and lignin peroxidase
Source: Royal Society of Chemistry journal article supplement (doi:10.1039/c5ra21814d), 2015-12-18
Supplement: c5ra21814d1.pdf [file c5ra21814d1.pdf]

Supporting Information for the manuscript

**Probing molecular basis of single-walled carbon nanotube degradation and nondegradation by enzymes based on manganese peroxidase and lignin peroxidase**

Ming Chen,<sup>a,b,c</sup> Xiaosheng Qin,<sup>c,\*</sup>, Jian Li,<sup>c</sup> and Guangming Zeng<sup>a,b</sup>

<sup>a</sup>College of Environmental Science and Engineering, Hunan University, Changsha 410082, China

<sup>b</sup>Key Laboratory of Environmental Biology and Pollution Control (Hunan University), Ministry of Education, Changsha 410082, China

<sup>c</sup>School of Civil and Environmental Engineering, Nanyang Technological University, Singapore 639798

**Keywords:** carbon nanotube, biodegradation, enzyme, interaction, environmental remediation.

\*Corresponding author: Dr. Qin Xiaosheng, School of Civil and Environmental Engineering, Nanyang Technological University, Singapore 639798; Tell: +65-67905288; Fax: +65-67921650; E-mail: xsqin@ntu.edu.sg

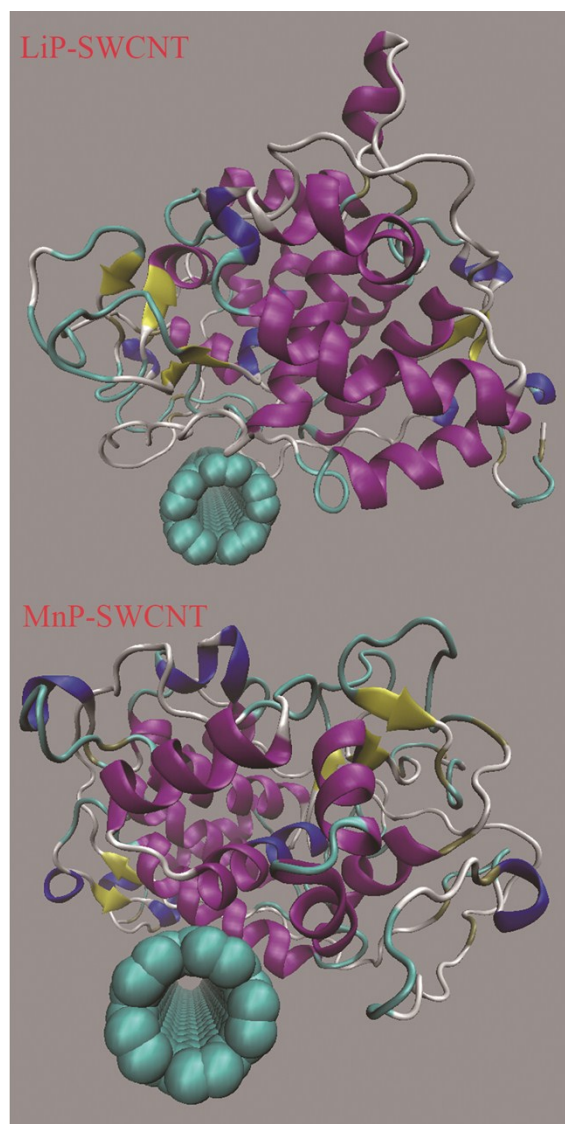

**Figure S1. Initial configurations of LiP-SWCNT and MnP-SWCNT in water.**

**Table S1. Residues of LiP within 3 Å of SWCNT during the simulation**

| <b>Time (ns)</b> | <b>Residues</b>                                                                                                     |
|------------------|---------------------------------------------------------------------------------------------------------------------|
| 0                | HIS30, PRO296, GLY297, ASN298, GLY299, PRO300, LEU328, PRO329, ILE338, PRO339, HIS341, LYS342                       |
| 10               | GLN33, GLY35, THR196, ILE199, PRO296, GLY297, GLY299, PHE303, LEU328, PRO329, ALA336, ILE338                        |
| 20               | HIS30, GLN33, GLY35, THR196, ILE199, PRO296, GLY297, ASN298, GLY299, PHE303, LEU328, PRO329, ALA336, ILE338, PRO339 |
| 30               | HIS30, GLN33, THR196, PRO197, ILE199, PRO296, GLY297, PRO300, PHE303, LEU328, PRO329, PRO339                        |

**Table S2. Residues of MnP within 3 Å of SWCNT during the simulation**

| <b>Time (ns)</b> | <b>Residues</b>                                                      |
|------------------|----------------------------------------------------------------------|
| 0                | ARG8, ARG122, PHE264, ALA267, ARG270, ALA271                         |
| 10               | ARG8, ARG122, PRO249, ILE254, PHE264, ALA267, SER321, GLU322         |
| 20               | ARG8, ARG122, ARG250, CYS253, ILE254, PHE264, ALA267, ARG270, SER321 |
| 30               | ARG8, PHE164, CYS253, ILE254, PHE264, ALA267, SER321                 |
